# Supplementary material for: Resource limitation prevents the emergence of drug resistance by intensifying within-host competition
Source: PubMed Central journal article supplement — Proc Natl Acad Sci U S A. 2017 Dec 12;114(52):13774–9. doi: 10.1073/pnas.1715874115 (PMC5748215; doi:10.1073/pnas.1715874115), 2017-12-12
Supplement: pnas.201715874SI.pdf [file pnas.201715874SI.pdf]

# Supporting Information

Wale et al. 10.1073/pnas.1715874115

## SI Discussion

### The Impact of pABA Limitation on Susceptible Parasites in Experiment

**1.** Limitation of pABA prevented the rebound of susceptible parasites, in addition to the emergence of resistance (Fig. 1). There are several possible explanations for this. First, susceptible parasites did not require as much pABA as resistant parasites, but they do require pABA for optimal growth, as evidenced by the fact that pABA limitation reduced the total size of single susceptible parasite infections in experiment 2 (Fig. S2). During the posttreatment period, in the face of excess mortality caused by drugs and immunity, a small difference in replication rate caused by pABA limitation could mean the difference between a rebound and none (see also Fig. S4, bottom two rows). Second, pABA limitation could potentiate the activity of pyrimethamine, as it does in other species of malaria parasites (1–3). A third possibility is that rebounding parasites in the pABA-supplemented treatment are not, in fact, susceptible to pyrimethamine. Our phenotypic test of resistance is very conservative, so that only a very high level of resistance is detected. Our genetic test of resistance is also not a catch-all. The S106N is characteristic of pyrimethamine resistance in this system (as is its homolog S108N in *Plasmodium falciparum*), but it is not the only genetic route to pyrimethamine resistance (e.g., refs. 4, 5). Mutants carrying mutations other than S106N would not be deemed resistant in our assay.

**The Impact of pABA Limitation on Pyrimethamine-Resistant Parasites in the Absence of Competition.** While resistant parasites grew relatively unabated in single infections in the absence of the drugs

in both pABA treatments (Fig. S2A) and when drugs are administered in the pABA-supplemented treatment (Fig. 2C), the growth of resistant parasites stalls during drug treatment in the pABA-limited treatment. This observation suggests there is an interaction between the activity of pyrimethamine and pABA limitation, as has been observed in *in vitro* cultures of *P. falciparum* (3, 6). A plausible explanation for the interaction is suggested by work on *P. falciparum*. Parasites acquire tetrahydrofolate endogenously by producing it from pABA via the folate pathway and exogenously by acquiring preformed folates from the host environment (2, 7–9). Pyrimethamine-resistant parasites carrying a single resistance mutation in the DHFR gene have a low capacity to acquire folate exogenously, which likely causes their higher requirements for pABA (10). Moreover, pyrimethamine inhibits the ability of pyrimethamine-resistant parasites to acquire folate via the exogenous route (11). Thus, the simultaneous application of pABA limitation and pyrimethamine treatment might retard the ability of resistant parasites to replicate. There being an interaction between pABA limitation and the activity of pyrimethamine does not, however, account for the impact of resource limitations on resistance emergence, since resistant parasites do flourish in the period after drug treatment. To what extent the “stalling” effect of pABA limitation alters the dynamics of competition, and hence the efficacy of resource limitation as a resistance management strategy, is an empirical question that warrants further research.

1. Thurston JP (1954) The chemotherapy of *Plasmodium berghei*. II. Antagonism of the action of drugs. *Parasitology* 44:99–110.
2. Milhous WK, Weatherly NF, Bowdre JH, Desjardins RE (1985) *In vitro* activities of and mechanisms of resistance to antifolate antimalarial drugs. *Antimicrob Agents Chemother* 27:525–530.
3. Watkins WM, Sixsmith DG, Chulay JD, Spencer HC (1985) Antagonism of sulfadoxine and pyrimethamine antimalarial activity *in vitro* by p-aminobenzoic acid, p-aminobenzoylglutamic acid and folic acid. *Mol Biochem Parasitol* 14:55–61.
4. Cowman AF, Lew AM (1989) Antifolate drug selection results in duplication and rearrangement of chromosome 7 in *Plasmodium chabaudi*. *Mol Cell Biol* 9:5182–5188.
5. Lozovsky ER, et al. (2009) Stepwise acquisition of pyrimethamine resistance in the malaria parasite. *Proc Natl Acad Sci USA* 106:12025–12030.
6. Tan-ariya P, Brockelman CR (1983) Continuous cultivation and improved drug responsiveness of *Plasmodium falciparum* in p-aminobenzoic acid-deficient medium. *J Parasitol* 69:353–359.
7. Salcedo-Sora JE, et al. (2011) The molecular basis of folate salvage in *Plasmodium falciparum*: Characterization of two folate transporters. *J Biol Chem* 286:44659–44668.
8. Krungkrai J, Webster HK, Yuthavong Y (1989) *De novo* and salvage biosynthesis of pteroylpentaglutamates in the human malaria parasite, *Plasmodium falciparum*. *Mol Biochem Parasitol* 32:25–37.
9. Wang P, Wang Q, Sims PFG, Hyde JE (2007) Characterisation of exogenous folate transport in *Plasmodium falciparum*. *Mol Biochem Parasitol* 154:40–51.
10. Wang P, Nirmalan N, Wang Q, Sims PFG, Hyde JE (2004) Genetic and metabolic analysis of folate salvage in the human malaria parasite *Plasmodium falciparum*. *Mol Biochem Parasitol* 135:77–87.
11. Wang P, Brobey RK, Horii T, Sims PF, Hyde JE (1999) Utilization of exogenous folate in the human malaria parasite *Plasmodium falciparum* and its critical role in antifolate drug synergy. *Mol Microbiol* 32:1254–1262.









TCCGTTGATAAGTTACAAAATATTGTAGTAATGGGAAAAGCAAGTTGGGAAAGCATCCCCTCAAAAATTTAAGCCATTACAAAAT  
 Experiment 2 AJ22p TCCGTTGATAAGTTACAAAATATTGTAGTAATGGGAAAAGCAAGTTGGGAAAGCATCCCCTCAAAAATTTAAGCCATTACAAAAT  
 AJ35p TCCGTTGATAAGTTACAAAATATTGTAGTAATGGGAAAAGCAAGTTGGGAAAGCATCCCCTCAAAAATTTAAGCCATTACAAAAT  
 AS123p TCCGTTGATAAGTTACAAAATATTGTAGTAATGGGAAAAGCAAATTGGGAAAGCATCCCCTCAAAAATTTAAGCCATTACAAAAT  
 Experiment 3 AS13p TCCGTTGATAAGTTACAAAATATTGTAGTAATGGGAAAAGCAAGTTGGGAAAGCATCCCCTCAAAAATTTAAGCCATTACAAAAT  
 AJ36p TCCGTTGATAAGTTACAAAATATTGTAGTAATGGGAAAAGCAAATTGGGAAAGCATCCCCTCAAAAATTTAAGCCATTACAAAAT  
 Experiment 4 AT2p TCCGTTGATAAGTTACAAAATATTGTAGTAATGGGAAAAGCAAGTTGGGAAAGCATCCCCTCAAAAATTTAAGCCATTACAAAAT  
 CW29p TCCGTTGATAAGTTACAAAATATTGTAGTAATGGGAAAAGCAAATTGGGAAAGCATCCCCTCAAAAATTTAAGCCATTACAAAAT

**Fig. S7.** DHFR genotype of parasites used in experiments 2, 3, and 4. Partial DHFR sequences of susceptible (labeled in black) and pyrimethamine-resistant (labeled in red) parasite strains used in experiments 2–4 are shown. Differences from the pyrimethamine-susceptible reference sequence (accession no. L28120.1; top, large colored letters) are indicated by colored bases. The mutation from G to A present in the resistant parasites confers pyrimethamine resistance in *P. chabaudi*. Note that the mutation from C to T in the AT2p sequence is a synonymous mutation.

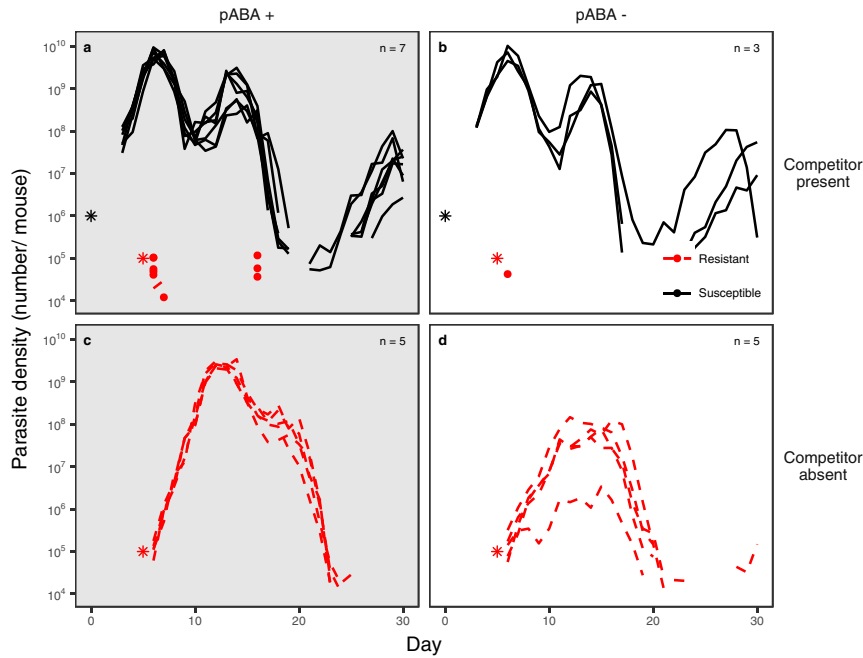

**Fig. S8.** Resistant parasites are competitively suppressed by susceptible parasites in untreated mice. Parasite dynamics of individual mice infected with both susceptible (black, solid lines) and resistant (red, dashed lines) parasites (A and B) and only resistant parasites (C and D) in block 1 of experiment 2 are shown. Stars represent the number of parasites inoculated and the time at which they were administered. Dots indicate the density of parasites detected on a particular day in instances where parasites were not detected the day before or after. n, number of mice.

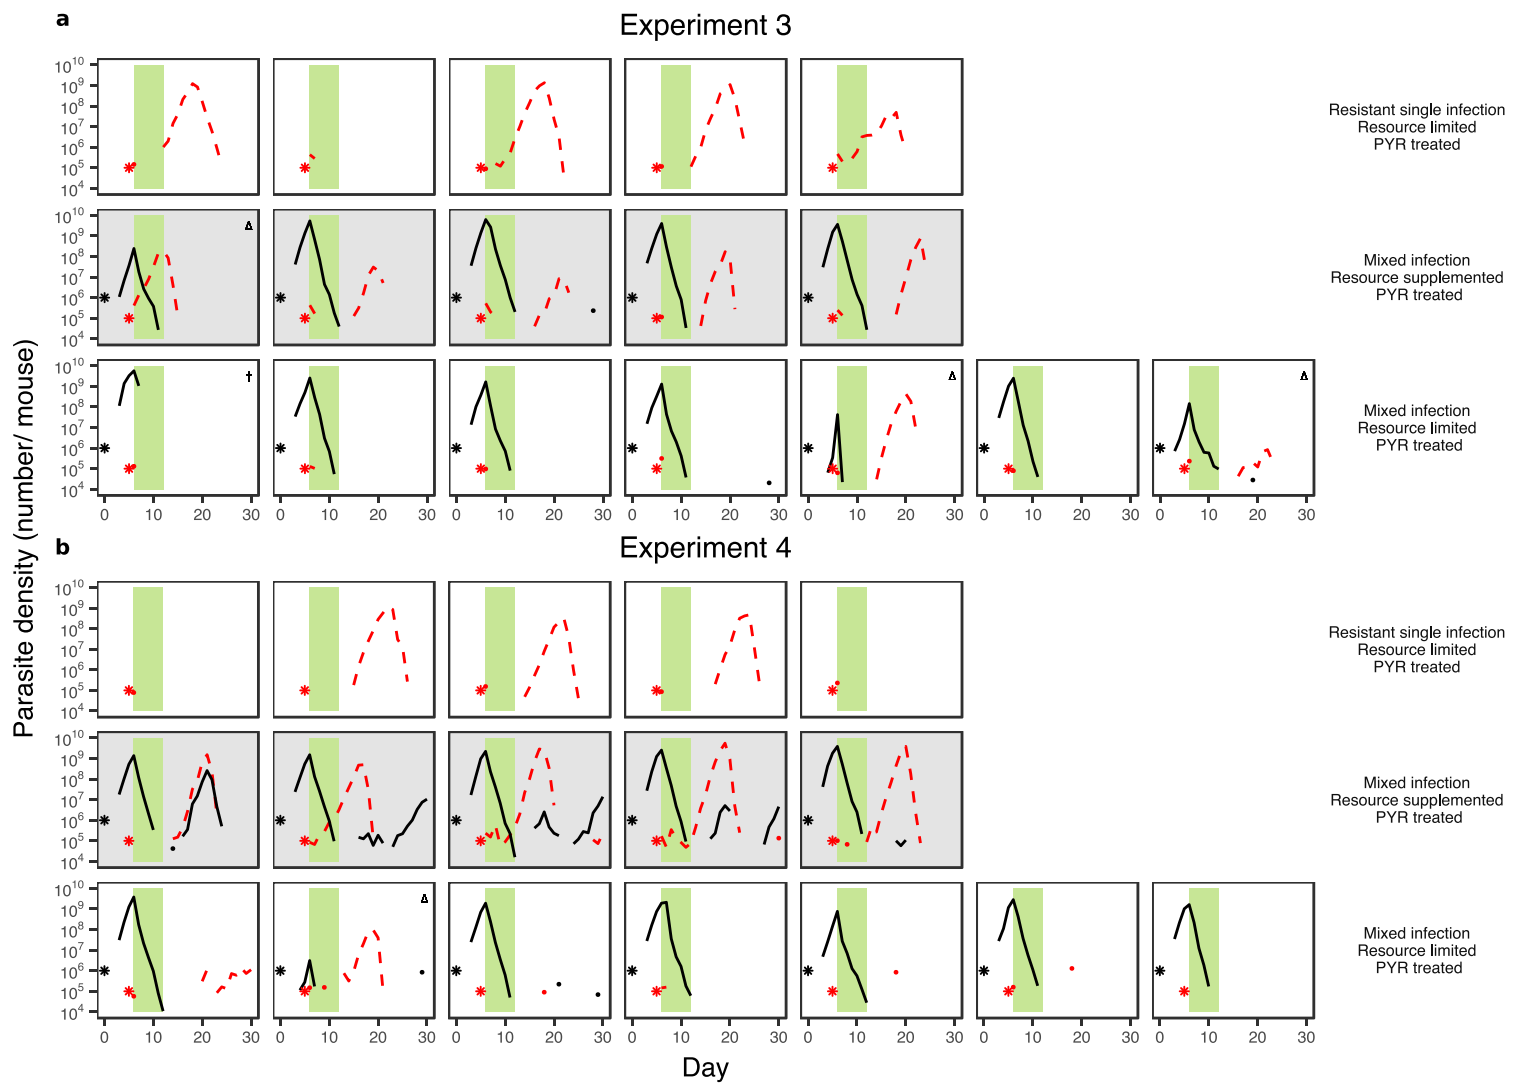

**Fig. 59.** Dynamics of infections of individual mice in experiments 3 and 4. Dynamics of susceptible (black, solid lines) and pyrimethamine-resistant (red, dashed lines) parasites in single (*A* and *B*, *Top*) or mixed (*A* and *B*, *Middle* and *Bottom*) infections of mice in resource-supplemented (gray background) and resource-limited (white background) treatments are shown. All mice in experiment 3 were infected with  $R_{AJ}$ , and those in mixed-infection treatments were also infected with  $S_{AS}$ . In experiment 4, mice were infected with  $R_{CW}$ , and those in the mixed-infection treatments were also infected with  $S_{AT}$ . Each subplot shows the infection dynamics of an individual mouse. Stars represent the number of parasites inoculated and the time at which they were administered. Dots represent the density of parasites detected on a particular day in instances where parasites were not detected the day before or after. The green bar indicates the duration and timing of pyrimethamine treatment. The open triangles indicate that mice were inoculated with fewer susceptible parasites than intended and were excluded from all analyses. PYR, pyrimethamine.

**Table S1. Rates of resistance emergence and number of mice in each treatment of the competition experiments**

| Infection composition   | Experiment 2 ( $S_{AJ}$ , $R_{AS}$ ) |           |                      |                     |                   |                                   | Experiment 3 ( $S_{AS}$ , $R_{AJ}$ ) |                                       | Experiment 4 ( $S_{AT}$ , $R_{CW}$ ) |                                   |
|-------------------------|--------------------------------------|-----------|----------------------|---------------------|-------------------|-----------------------------------|--------------------------------------|---------------------------------------|--------------------------------------|-----------------------------------|
|                         | Block 1                              |           |                      |                     | Block 2           |                                   | pABA <sup>+</sup>                    | pABA <sup>-</sup>                     | pABA <sup>+</sup>                    | pABA <sup>-</sup>                 |
|                         | pABA <sup>+</sup>                    |           | pABA <sup>-</sup>    |                     | pABA <sup>+</sup> | pABA <sup>-</sup>                 |                                      |                                       |                                      |                                   |
|                         | Drug-treated                         | Untreated | Drug-treated         | Untreated           | Drug-treated      |                                   | Drug-treated                         |                                       |                                      |                                   |
| Resistant + susceptible | <b>4/4</b><br>5 (1*)                 | 8 (1*)    | <b>0/5</b><br>8 (3*) | 8 (5 <sup>‡</sup> ) | <b>5/5</b><br>5   | <b>0/6</b><br>7 (1 <sup>†</sup> ) | <b>4/4</b><br>5 (1 <sup>†</sup> )    | <b>0/4</b><br>7 (2 <sup>†</sup> , 1*) | <b>5/5</b><br>5                      | <b>0/6</b><br>7 (1 <sup>†</sup> ) |
| Resistant alone         | <b>5/5</b><br>5                      | 5         | <b>5/5</b><br>5      | 5                   |                   | <b>3/5</b><br>5                   |                                      | <b>4/5</b><br>5                       |                                      | <b>3/5</b><br>5                   |
| Susceptible alone       | <b>NA</b><br>5 (1*)                  | 5 (2*)    | <b>NA</b><br>5 (1*)  | 5                   |                   |                                   |                                      |                                       |                                      |                                   |

The frequency of resistance emergence (number of mice in which resistant parasites grew continuously posttreatment/number of mice included in the analysis) in drug-treated treatments is indicated in bold in the top row of each cell. The initial number of mice in each treatment is indicated in the bottom row. The genetic background of susceptible (S) and resistant (R) strains used in each experiment is indicated by the subscript (*Materials and Methods*). NA, not applicable.

\*Number of mice that were removed from the analysis because they died.

<sup>†</sup>Number of mice that were inoculated with fewer parasites than intended.

<sup>‡</sup>Number of mice that accidentally received drug treatment.
